# Supplementary material for: Engineering and characterization of fluorogenic glycine riboswitches
Source: PubMed Central journal article supplement — Nucleic Acids Res. 2016 May 24;44(12):5983–92. doi: 10.1093/nar/gkw465 (PMC4937332; doi:10.1093/nar/gkw465), 2016-05-24
Supplement: supp_gkw465_nar-00654-f-2016-File007.pdf [file supp_gkw465_nar-00654-f-2016-File007.pdf]

# Supplementary Information

## Engineering and Characterization of Fluorogenic Glycine Riboswitches

Simon Ketterer<sup>1,2</sup>, Lukas Gladis<sup>1,2</sup>, Adnan Kozica<sup>1,2</sup> and Matthias Meier<sup>1,2,\*</sup>

<sup>1</sup>Microfluidic and Biological Engineering, Department of Microsystems Engineering - IMTEK, University of Freiburg, Georges-Koehler-Allee 103, 79110 Freiburg, Germany

<sup>2</sup>Centre for Biological Signalling Studies - BIOSS, University of Freiburg, Schänzlestrasse 18, 79104 Freiburg, Germany

\* Correspondence should be addressed to: matthias.meier@imtek.de

### Index

#### Methods

Microfluidic chip production and workflow for building up pull-down assay .....2

#### Figures

**Figure S1:** Schematic of the patch oligonucleotide synthesis (POS) .....3

**Figure S2:** The microfluidic chip platform .....4/5

**Figure S3:** Fluorescence signal of the fluorogenic glycine riboswitches and the negative control constructs .....6

**Figure S4:** The apparent glycine dissociation constants ( $K_D$ ) .....6

**Figure S5:** Thermodynamic comparison on and off chip .....7

**Figure S6:** Specificity of the fluorescence glycine riboswitches .....7

**Figure S7:** On-rates of the fluorogenic riboswitches at different glycine concentrations.....8

**Figure S8:** Comparison of fluorogenic glycine riboswitches to wild type Spinach .....8

**Figure S9:**  $Mg^{2+}$ -dependency of the T8A7 glycine riboswitch .....9/10

#### Tables

**Table S1:** Used oligonucleotide sequences .....11

**Table S2:** Examined transmitter sequences .....11

**Table S3:** Thermodynamic and kinetic parameters .....Supplemented online

**Table S4:** Glycine binding parameters of fluorogenic riboswitches with and without anchor sequence...13

## METHODS

### Microfluidic chip production and workflow for building up pull-down assay

Polydimethylsiloxane (PDMS) chips were manufactured following the standard procedure for multilayer devices (Unger 2002). In short, control and flow molds were fabricated by using SU-8 3025 (MicroChem, USA) and AZ 9260 (MicroChemicals, Germany), respectively. The feature height of the control mold was  $25\pm 1\ \mu\text{m}$  and  $18\pm 1\ \mu\text{m}$  for the flow mold. PDMS (Sylgard 184, from Dow Corning, USA) was cast onto both molds and cured for 20 min at  $80^\circ\text{C}$ . Bonding between the flow and control PDMS layers was achieved by using an off-ratio method. Assembled PDMS devices were aligned to the spotted epoxy-coated glass slide and thermally bonded on a hot plate for 6 h at  $80^\circ\text{C}$ .

Automated perfusion and actuation operations on chip included the following sequential steps (Figure S1B): (1) Coating of the epoxy-coated glass slide with biotinylated BSA 1 mg/mL in PBS (Thermo Scientific, Germany). (2) Deposition of NeutrAvidin 0.5 mg/mL in PBS (Thermo Scientific, Germany). (3) Actuation of the membrane valve that protects a circular area ( $80\ \mu\text{m}$  diameter) of the pull-down chamber during the passivation step by flushing biotinylated BSA, (Meier, Maerkl). (4) Lift off of the button valve during perfusion of  $10\ \mu\text{M}$  capture DNA that is biotinylated at 3' end (Sigma Aldrich, Germany). (5) Introduction of the *in vitro* transcription (IVT) solution (HiScribe T7 High YieldRNASynthesis Kit, NewEngland Biolabs, USA) into the 640 microchambers containing the DNA spots. The transcription of Spinach DNA mutants was initiated upon heating to  $37^\circ\text{C}$  for 2 h using an ITO heating glass slide (Tokai Hit, Japan). (6) Transcribed Spinach mutant RNAs were allowed to diffuse to the pull-down area in the separated unit cells. (7) Synthesized riboswitches were pulled down to the capture DNA. (8) Washing of nonhybridized RNAs from the unit cells with detection buffer. Workflow of the thermodynamic and kinetic experiments is presented in Figure S1C.

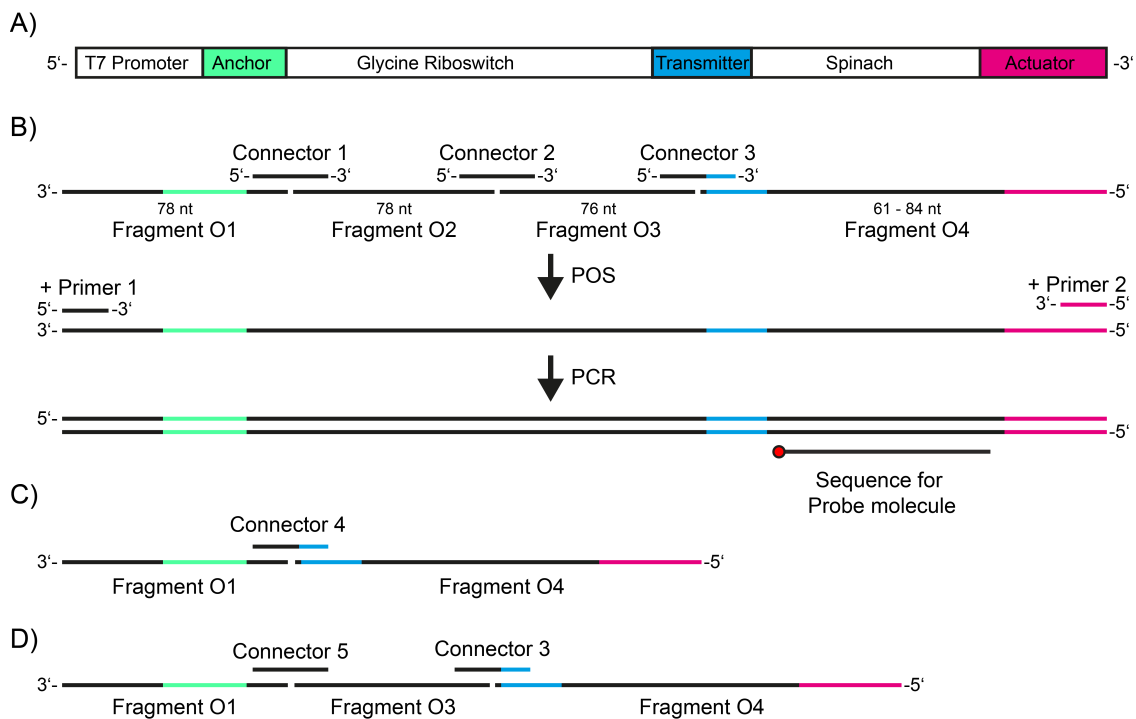

**Figure S1.** Schematic of the patch oligonucleotide synthesis (POS) used to generate fluorogenic glycine riboswitches. **A)** Sequence design of a fluorogenic glycine riboswitch for functional screening on a microfluidic chip. The variable transmitter is indicated in blue, the variable actuator sequence is indicated in pink, and the pull-down anchor is indicated in green. **B)** POS synthesis reaction scheme of the fluorogenic glycine riboswitches for the screening library. All corresponding sequences are given in table S1. **C)** POS of the negative control riboswitches without the glycine sensor aptamers. **D)** POS of the fluorogenic glycine riboswitch truncated by Gly-Apt-1.

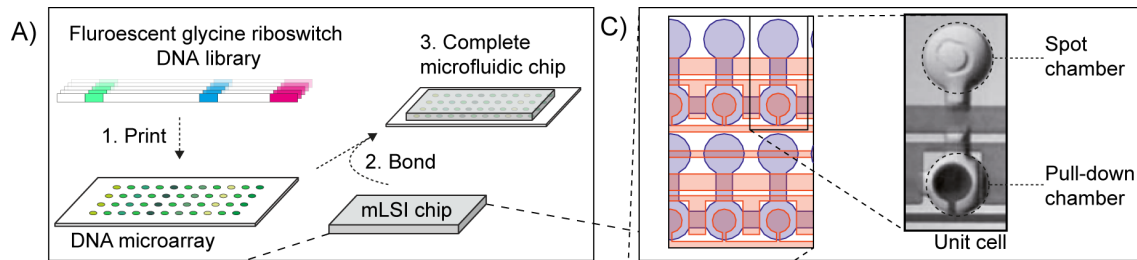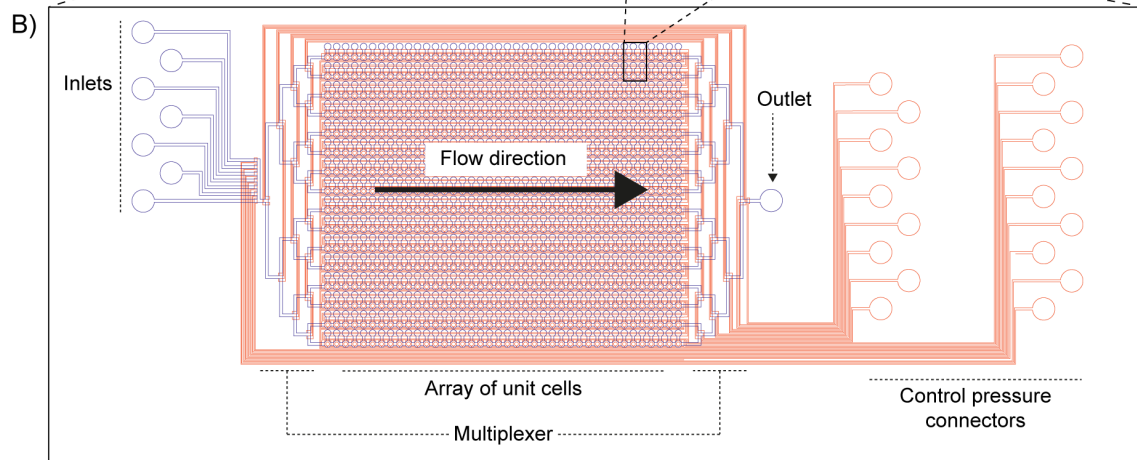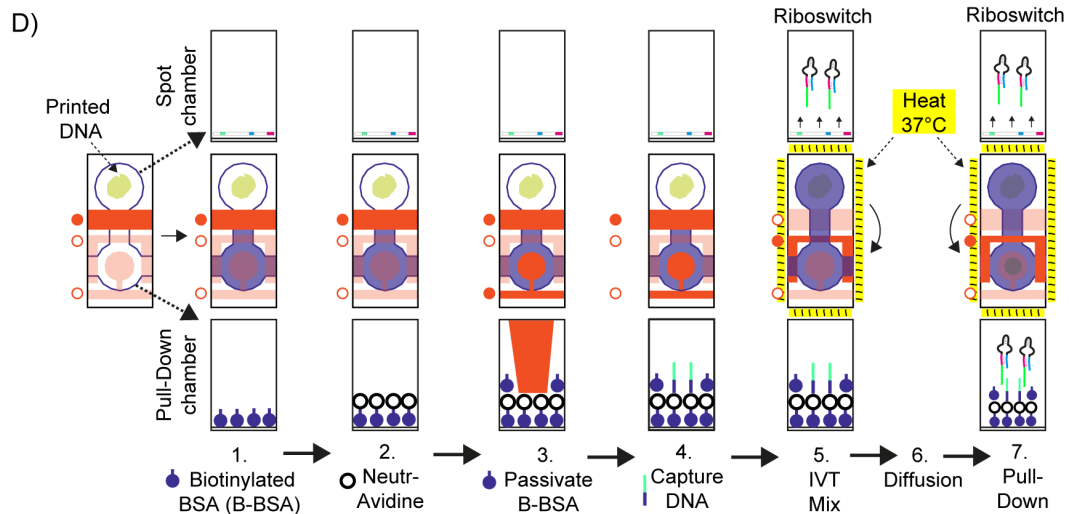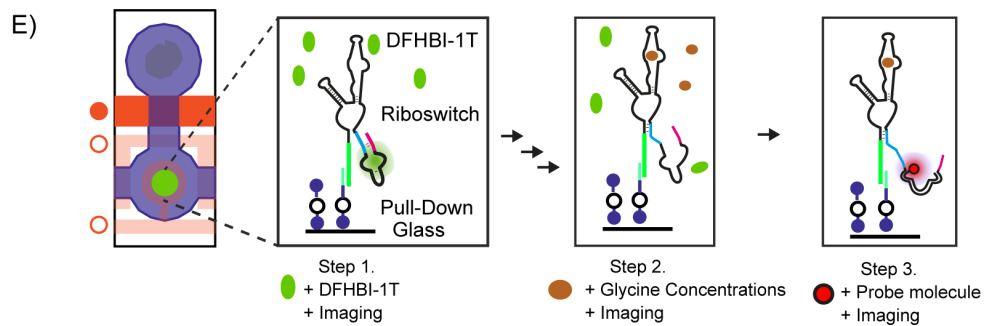

**Figure S2.** Microfluidic chip-based workflow for functional screening and biophysical characterization of riboswitches. A) The DNA library was printed onto an epoxy-coated microscope slide. The PDMS-based microfluidic large-scale integration chip platform was then aligned and bonded to the microarray. B) Overall design and mLSI control elements of the microfluidic chip to test biomolecular interactions where control and flow channels are colored in red and blue, respectively. The chip has been previously published and described in its general functionality (20,23,31). C) Operational unit cell of the mLSI chip. One unit cell is separated by a pneumatic membrane valve into two microchambers with a volume of 1 nL. After alignment to the microarray, the top chamber contains the DNA spot of a riboswitch construct. Within the bottom chamber, the pull-down assay is built up. D) Chemical work program, which was automated and parallelized for all unit cells on chip. Within the cartoon, the red line denotes the pneumatic membrane valves where the open and closed small circle at the side of each panel denote open and closed valve states, respectively. Additionally, closed and open valves in the panels are marked with dark and light red, respectively. Fluids are highlighted in blue. Symbols for the surface pull-down are given in the panels. The fluidic workprogram Step 1 and 2: Build up of the pull-down assay within the assay chamber. For this, biotinylated BSA and NeutrAvidin are sequentially introduced with buffer flushing in between. Step 3: The button valve is closed and the biotinylated BSA is flushed to passivate all NeutrAvidin molecules outside the button area. Step 4: A biotinylated capture probe is deposited on the pull-down area by lifting the button valve. Step 5: The *in vitro* transcription solution is introduced and guided into the spot chamber. Step 6: The chip is heated on a thermoplate to 37°C for 2 hours (yellow box in the panel). During this step, the unit cells are separated and free diffusion of the synthesized RNA between the spot and pull-down chamber can occur. Step 7: Hybridization of the riboswitches to the pull-down anchor. E) On chip operations for determining apparent thermodynamic and kinetic parameters of the fluorogenic glycine riboswitches in response to glycine. Step 1: After the riboswitches are produced and pulled down to the surface of each unit cell, the detection buffer with DFHBI-1T is introduced. All unit cells are imaged. Step 2: The glycine concentration is increased sequentially within the unit cells. After each concentration step, the unit cells are imaged. In case kinetic parameters are measured, real time imaging of each unit cell is performed. Step 3: For determination of the riboswitch concentration on the pull-down area, the detection probe against the actuator is introduced. The chip is once more imaged. All required chemicals and concentrations to establish the miniaturized pull-down are given in the methods and materials section.

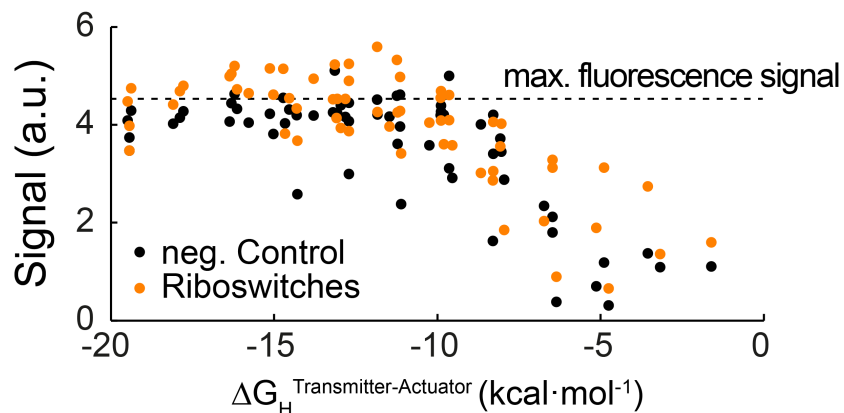

**Figure S3.** Fluorescence signal of the fluorogenic glycine riboswitches and the negative control constructs (without Gly-Apt-1 and 2) plotted against their theoretical hybridization energy ( $\Delta G_H$ ) of the transmitter/actuator strand. The maximal possible Spinach/DFHBI-1T fluorescence signal (dashed line) was obtained for fluorogenic glycine riboswitch design with a transmitter/actuator pair exhibiting  $\Delta G_H$  larger -10 kcal/mol. Measurements were made within the detection buffer without glycine.

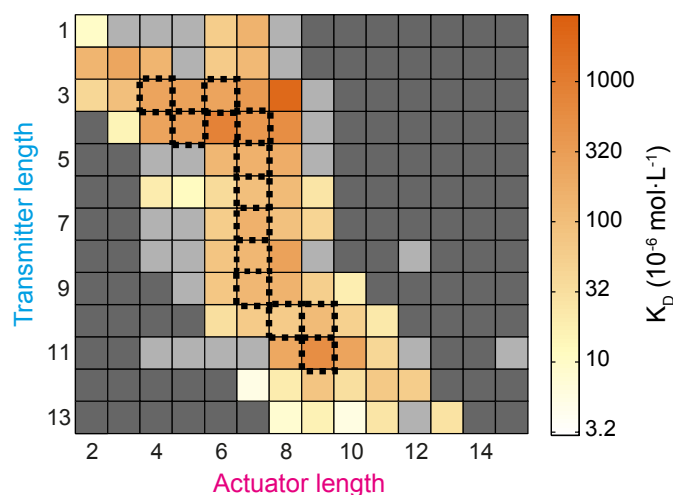

**Figure S4.** The apparent glycine dissociation constants ( $K_D$ ) of the fluorogenic glycine riboswitch screened on chip.  $K_D$  values are plotted in dependence of the transmitter/actuator chain lengths of the riboswitches. The top 12 fluorogenic riboswitches with the highest  $\Delta S$  from figure 2B are indicated by dotted border lines. Grey squares indicating non-measured values.

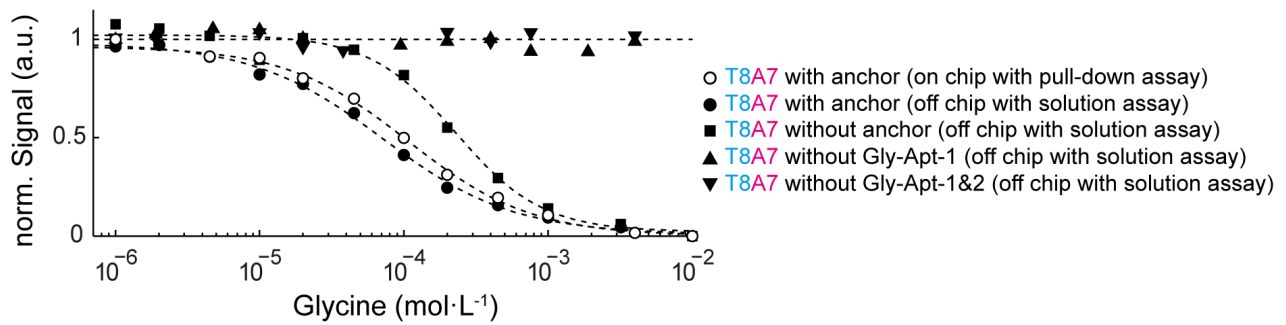

**Figure S5.** Comparison of the fluorescence signals obtained for the fluorogenic glycine riboswitch T8A7 on and off chip. The experiment shows that miniaturization and pull-down technology on chip did not alter the binding response of the fluorogenic glycine riboswitch.

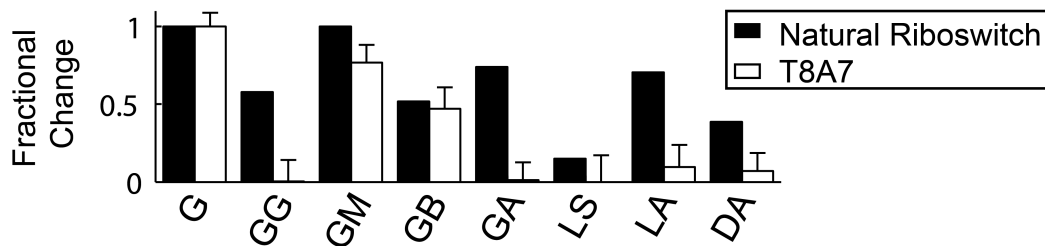

**Figure S6.** Specificity of the fluorogenic glycine riboswitch T8A7 compared to the natural glycine riboswitch. The open bars shows the fractional fluorescence signal change of the glycine upon addition of 10 mM glycine (G), glycyl-glycine (GG), glycine methyl ester (GM), glycine tert-butyl ester (GB), glycinamide (GA), L-serine (LS), L-alanine (LA), D-alanine (DA). The fractional change is normalized to the induced fluorescence change of the riboswitch by glycine. The closed bars show the fraction of early-terminated mRNAs to full-length transcribed mRNAs of a control gene containing the natural riboswitch sequence at the 5' UTR region measured within a single-round transcription assay. The compared data set is taken from Mandal *et al.* (5).

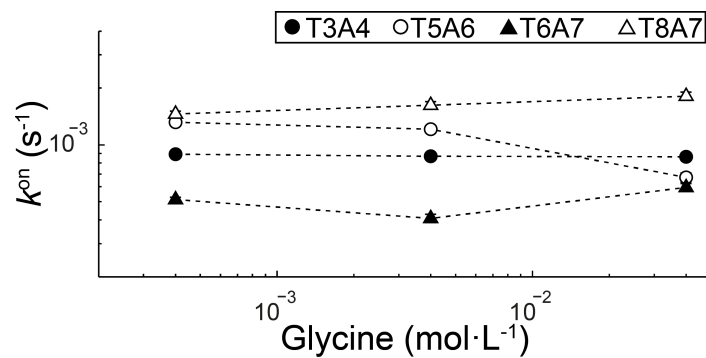

**Figure S7.** Representative apparent on-rates of glycine binding to four fluorogenic glycine riboswitch with different transmitter/actuator chain length in dependence of the glycine concentration.

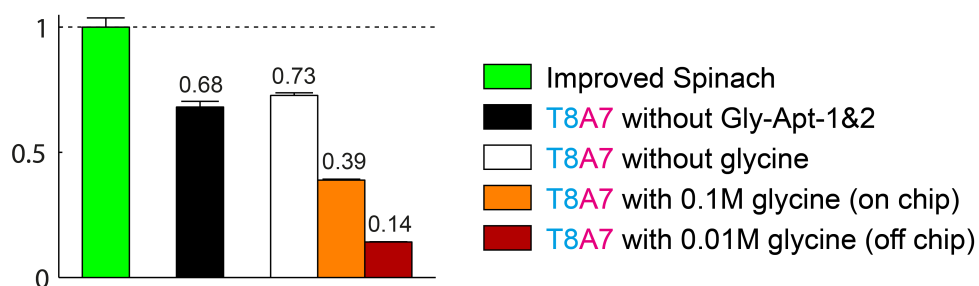

**Figure S8.** Normalized fluorescence signal change of the fluorogenic glycine riboswitch with a transmitter/actuator sequence of T8A7 compared to the improved wild type Spinach sequence. Values were recorded at 28°C.



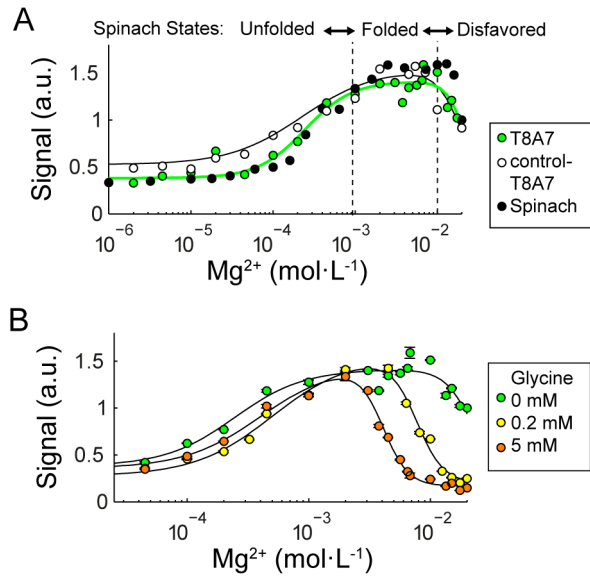

**Figure S9.** Magnesium dependency of the T8A7 fluorogenic glycine riboswitch. **A)** The magnesium dependency of the fluorescence signal intensity of the T8A7 glycine riboswitch, the negative control construct of T8A7, and Spinach (Ketterer et al. improved Spinach version) in absence of glycine. All three fluorogenic RNAs show a three state fluorescence response to the magnesium concentration. 1. The unfolded (*U*) state: At low magnesium concentration, no fluorescence signal can be detected for any construct. This is due to the fact that Spinach requires for folding its fluorogenic structure a low millimolar magnesium concentration (10). 2) The folded (*F*) state: From 0.1 mM magnesium in the detection buffer Spinach starts to form its functional fluorogenic structure. Most importantly, between a magnesium concentration of 1 to 10 mM the fluorescence signal of Spinach and the Spinach actuator within the negative and positive T8A7 riboswitch in absence of glycine was constant. 3) The disfavored (*D*) state: At magnesium concentrations higher than 10 mM the fluorescence of the negative and positive T8A7 riboswitch is decreasing. The reason for this decrease is unclear; however, it was also observed for the used Spinach version at a magnesium concentration of 20 mM and, thus, not caused by the glycine riboswitch. **B)** The magnesium dependency of glycine binding to the T8A7 fluorogenic riboswitch. For obtaining the magnesium binding constants to the T8A7 riboswitch at different glycine concentrations, we used the descriptive three state model from A), combining the [*U*], [*F*], and [*D*] states of the Spinach actuator. It is expected that the glycine concentration shifts the Spinach actuator within the riboswitch from the folded into the unfolded state. Only the first two states contribute to a fluorescence signal, where the signal (*S*) of the *F* state outnumbers the signal of the *U* state. Thus, the measured fluorescence distribution is the quotient of  $(S_U \cdot [U] + S_S \cdot [S])$  of the total RNA amount ( $[U] + [S] + [D]$ ). With the magnesium concentration [*M*], the magnesium dissociation constants  $K_{D1}$  and  $K_{D2}$  (one for each transition), the corresponding Hill coefficients ( $h_1$  and  $h_2$ ) and the fluorescence background signal in absence of magnesium ( $S_B$ ), the fluorescence curve be described with the following equation:

$$S([M]) = \frac{S_U + S_F \cdot ([M]/K_{D1})^{h_1}}{1 + ([M]/K_{D1})^{h_1} \cdot (1 + ([M]/K_{D2})^{h_2})} + S_B$$

By fitting the model to the data in B), we obtained the following parameters:

| Glycine / mM | $K_{D1}$ / $\mu$ M | $K_{D2}$ / mM  | $h_1$         | $h_2$         |
|--------------|--------------------|----------------|---------------|---------------|
| 0            | 230 $\pm$ 40       | 15.8 $\pm$ 1.1 | 1.8 $\pm$ 0.5 | 7 $\pm$ 3     |
| 0.2          | 420 $\pm$ 50       | 8.3 $\pm$ 0.4  | 1.7 $\pm$ 0.3 | 4.3 $\pm$ 0.9 |
| 5            | 390 $\pm$ 130      | 4.2 $\pm$ 0.2  | 1.5 $\pm$ 0.5 | 4.3 $\pm$ 0.9 |

All measurements were taken at 28°C in detection buffer with the in-solution assay. All values are normalized to the fluorescence signal at 20 mM magnesium in the absence of glycine. 20 mM magnesium was used for all measurements in the manuscript.

**Table S1.** Oligonucleotide sequences for the synthesis of fluorogenic glycine riboswitches. The sequence for the variable fragment O4 and corresponding connector C3 and primer P2 is representative of the riboswitch with the actuator (**bold**), transmitter (underlined), and minimal Spinach (*italic*) sequence of the fluorogenic glycine riboswitch T13A13. For construction of all fluorogenic riboswitches only the transmitter/actuator pairs have to be exchanged.

| Label                                          | Sequence                                                                                                        | Modification |
|------------------------------------------------|-----------------------------------------------------------------------------------------------------------------|--------------|
| Fragment O1                                    | GTCTCTCCCCTTGCTGTCATTGCTCATATCTTGTGTTATTATTTTGA<br>ATGTTTGTTCCTATAGTGAGTCGTATTAGCG                              | 5'-Phos      |
| Fragment O2                                    | GAGCAAGAGTTCTTTTGCCTGAGAGATTCACTCCGCAGTTTGCTCC<br>TTCGGCGCCTGTATCCCCGAGGTTTTCGGTCAG                             | 5'-Phos      |
| Fragment O3                                    | AAGTTTACTTTGCATACGCAAAGACGTCCCCTTTGGTGGTTTGCGC<br>ATCCGCACAAACACTCTCCAGAGTTGCGTC                                | 5'-Phos      |
| Example: Fragment O4 for T13A13                | <b>CAGAGAACCGGAG</b> <i>CTCACACTCTACTCAACAGCTGCCGAAGCAGC</i><br><i>TGGACCCGTCCTTCTCCGGTTCTCTGTCTCTGGCACCTGA</i> |              |
| Connector C1                                   | CGAATGACAGCAAGGGGAGAGACCTGACCGAAAACCTCGGGATA CA                                                                 |              |
| Connector C2                                   | CTCAGGCAAAGAACTCTTGCTCGACGCAACTCTGGAGAGTGTTT                                                                    |              |
| Example: Connector C3 for T13A13               | CTTTGCGTATGCAAAGTAACTTTCAGGTGCCAGGACAGAGAAC                                                                     |              |
| Primer 1                                       | CGCTAATACGACTCACTATAGGGGAACA                                                                                    |              |
| Example: Primer 2 for T13A13                   | CAGAGAACCGGAGCTCACACT                                                                                           |              |
| Capture DNA                                    | TTGTGTTATTATTTTGAATGTTTGTTC                                                                                     | 3'-Btntg     |
| Spinach probe                                  | CACACTCTACTCAACAGCTGCCGAAGCAGCTGGACCCGTCC                                                                       | 3'-ROX       |
| Example: Connector 4 (negative control T13A13) | CGAATGACAGCAAGGGGAGAGACTCAGGTGCCAGGACAGAGAAC                                                                    |              |
| Fragment O1 for -Gly-Apt1 control              | CTTTTTTGTGTTATTATTTTGAATGTTTGTTCCTATAGTGAGTCG<br>TATTAGCG                                                       | 5'-Phos      |
| Connector 5                                    | CAAAATAATAACACAAAAAAGGACGCAACTCTGGAGAGTGTTT                                                                     |              |

**Table S2.** Transmitter and actuator sequences. The actuator sequence is given for the longest construct. In cases where the actuator sequence was longer than the transmitter, the actuator was designed to fold back to the 5' adjacent sensor bases. Riboswitches with actuator version T6\* was characterized and all thermodynamic values added to Table S3. The T6\* transmitter exhibits a higher GC content as T6 and thus resembles more closely the T8 constructs.

| Sensor sequence | Label | Transmitter sequences | Label | Actuator Sequence |
|-----------------|-------|-----------------------|-------|-------------------|
| GCCAGGA         | T1    | C                     | A8    | GUCCUGGC          |
| GCCAGGA         | T2    | CA                    | A8    | UGUCCUGG          |
| GCCAGGA         | T3    | CAG                   | A9    | CUGUCCUGG         |
| GCCAGGA         | T4    | CAGA                  | A9    | UCUGUCCUG         |
| GCCAGGA         | T5    | CAGAG                 | A9    | CUCUGUCCU         |
| GCCAGGA         | T6    | CAGAGA                | A9    | UCUCUGUCC         |
| GCCAGGA         | T6*   | CAGAGG                | A9    | CCUCUGUCC         |
| GCCAGGA         | T7    | CAGAGAG               | A9    | CUCUCUGUC         |
| GCCAGGA         | T8    | CAGAGAAG              | A11   | CUUCUCUGUCCU      |
| GCCAGGA         | T9    | CAGAGAAAG             | A10   | CUUUCUCUGU        |
| GCCAGGA         | T10   | CAGAGAAGAG            | A11   | CUCUUCUCUGU       |
| GCCAGGA         | T11   | CAGAGAAGGAG           | A15   | CUCCUUCUCUGUCCU   |
| GCCAGGA         | T12   | CAGAGAACGGAG          | A12   | CUCCGUUCUCUG      |
| GCCAGGA         | T13   | CAGAGAACCGGAG         | A13   | CUCCGGUUCUCUG     |

**Table S3.** Summary of all thermodynamic and kinetic parameters measured for the generated fluorogenic glycine riboswitch library. The table is added as text file.

**Table S4.** Comparison of the thermodynamic glycine binding parameters of fluorogenic riboswitches with and without anchor sequence. In both series the binding constant is increasing linearly with longer actuator length.

| Riboswitch | + Anchor Seq.<br>On Chip Assay |     | - Anchor Seq<br>In Solution Assay |      |
|------------|--------------------------------|-----|-----------------------------------|------|
|            | $K_D / \mu\text{M}$            | $h$ | $K_D / \text{mM}$                 | $h$  |
| T8A6       | 79.7±7                         | 1.3 | 121 ± 17                          | 1.55 |
| T8A7       | 125.8±4                        | 0.9 | 231 ± 32                          | 1.5  |
| T8A8       | 273.9±48                       | 0.4 | 450 ± 55                          | 1.3  |
| T8A9       | not functional                 |     | not functional                    |      |
